# Supplementary material for: Dapagliflozin and Empagliflozin Ameliorate Hepatic Dysfunction Among Chinese Subjects with Diabetes in Part Through Glycemic Improvement: A Single-Center, Retrospective, Observational Study
Source: Springer Nature journal article supplement (doi:10.1007/s13300-017-0355-3), 2018-01-10
Supplement: MOESM1 [file 15356034]

Supplementary data

Supplementary table 1. Baseline characteristics of study participants

| <b>Variables</b>                                                                    |             |
|-------------------------------------------------------------------------------------|-------------|
| N                                                                                   | 115         |
| Age, years                                                                          | 56.3 ± 11.1 |
| Gender, male/female                                                                 | 71/44       |
| Duration of diabetes, years                                                         | 16.1 ± 8.0  |
| Hypertension, n (%)                                                                 | 102 (88.7)  |
| Established cardiovascular disease, n (%)                                           | 32 (27.8)   |
| - Coronary heart disease, n (%)                                                     | 24 (20.9)   |
| - Stroke, n (%)                                                                     | 6 (5.2)     |
| - Peripheral vascular disease, n (%)                                                | 4 (3.5)     |
| Congestive heart failure, n (%)                                                     | 5 (4.3)     |
| Cancer, n (%)                                                                       | 6 (5.2)     |
| Estimated glomerular filtration rate<br>(ml/min/1.73m <sup>2</sup> )                | 90.5 ± 20.5 |
| Background anti-diabetic agents                                                     |             |
| - Metformin, n (%)                                                                  | 110 (95.7)  |
| - Dipeptidyl peptidase 4 inhibitors, n (%)                                          | 44 (38.3)   |
| - Sulphonylurea, n (%)                                                              | 44 (38.3)   |
| - Glitazones, n (%)                                                                 | 6 (5.2)     |
| - Glucagon like peptide receptor agonist, n (%)                                     | 7 (6.1)     |
| - Insulin, n (%)                                                                    | 66 (57.4)   |
| Lipid-lowering treatment, n (%)                                                     | 76 (66.1)   |
| Angiotensin converting enzymes inhibitors /<br>angiotensin receptor blockers, n (%) | 84 (73.0)   |
| Diuretics, n (%)                                                                    | 14 (12.2)   |
